# Supplementary material for: Promoting urea oxidation and water oxidation through interface construction on a CeO2@CoFe2O4 heterostructure
Source: Royal Society of Chemistry journal article supplement (doi:10.1039/d1dt01952j), 2021-01-01
Supplement: d1dt01952j1.pdf [file d1dt01952j1.pdf]

## Promoting the urea oxidation and water oxidation through interface construction on $\text{CeO}_2$ @ $\text{CoFe}_2\text{O}_4$ heterostructure

Zhixin Dai<sup>a</sup>, Xiaoqiang Du<sup>a\*</sup>, Yanhong Wang<sup>a</sup>, Xinghua Han<sup>a</sup> and Xiaoshuang Zhang<sup>b</sup>

<sup>a</sup>School of Chemical Engineering and Technology, North University of China, Xueyuan road 3, Taiyuan 030051, People's Republic of China. E-mail: duxq16@nuc.edu.cn

<sup>b</sup>School of Science, North University of China, Xueyuan road 3, Taiyuan 030051, People's Republic of China.

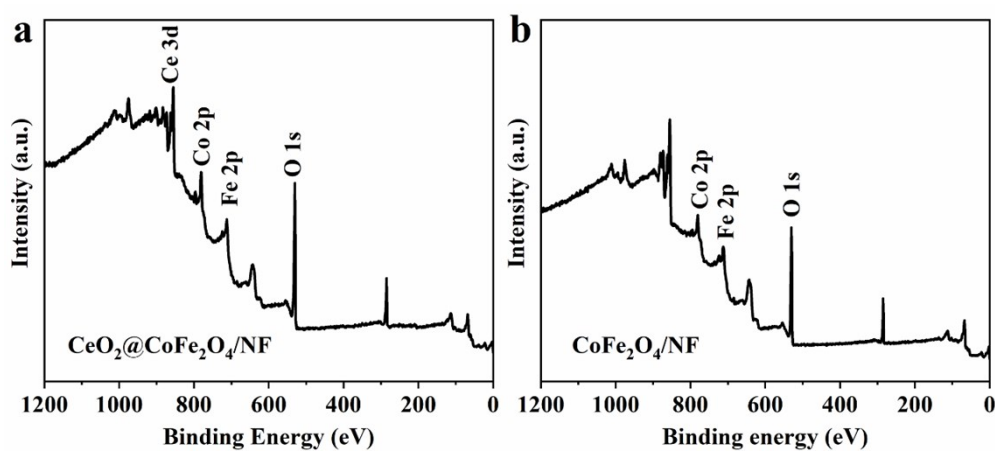

Fig. S1 XPS survey spectrum of  $\text{CeO}_2$ @ $\text{CoFe}_2\text{O}_4$ /NF and  $\text{CoFe}_2\text{O}_4$ /NF.

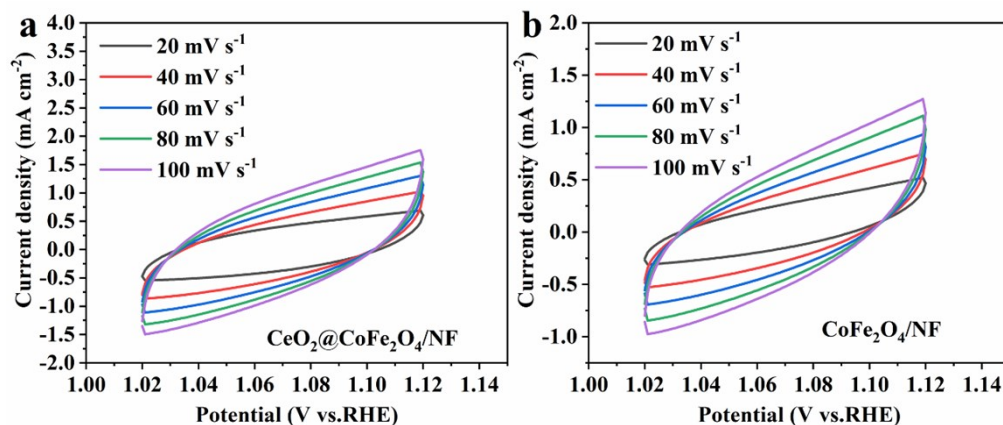

Fig. S2 CV curves of (a)  $\text{CeO}_2$ @ $\text{CoFe}_2\text{O}_4$ /NF and (b)  $\text{CoFe}_2\text{O}_4$ /NF at different scan rates from 20 to 100  $\text{mV/s}$  in 1.0 M KOH.

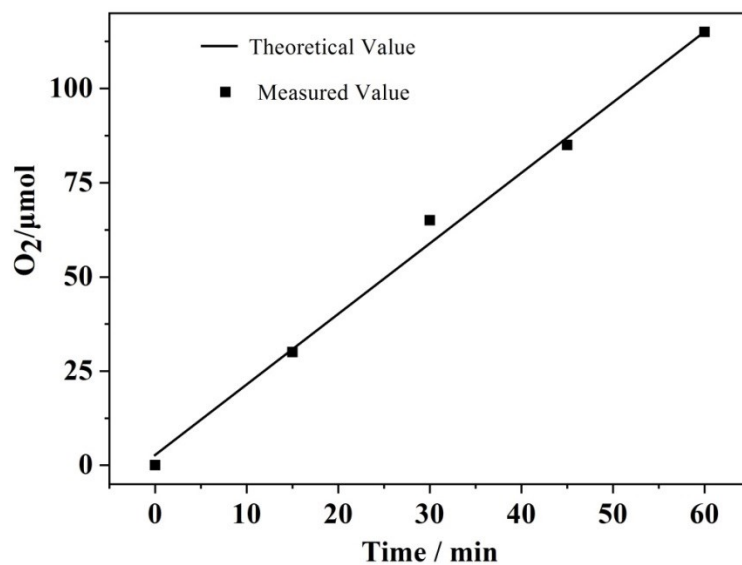

**Fig. S3** Electrocatalytic efficiency of O<sub>2</sub> production over CeO<sub>2</sub>@CoFe<sub>2</sub>O<sub>4</sub>/NF.

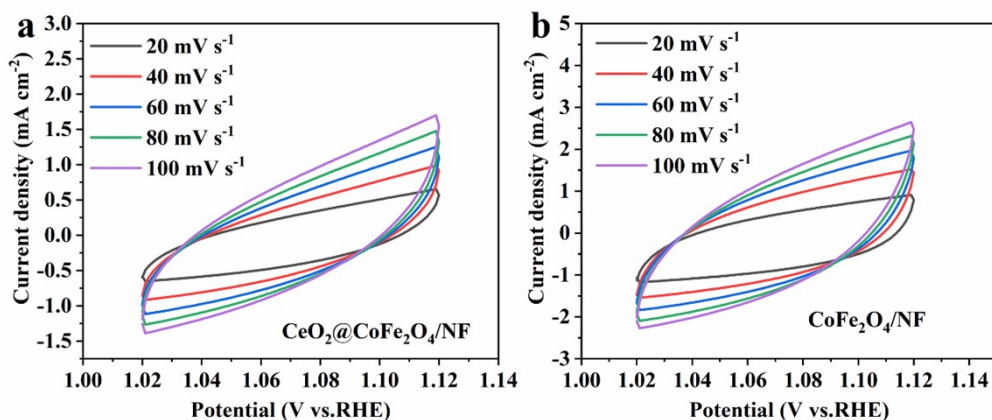

**Fig. S4** CV curves of (a) CeO<sub>2</sub>@CoFe<sub>2</sub>O<sub>4</sub>/NF and (b) CoFe<sub>2</sub>O<sub>4</sub>/NF at different scan rates from 20 to 100 mV/s in 1.0 M KOH with 0.5 M urea.

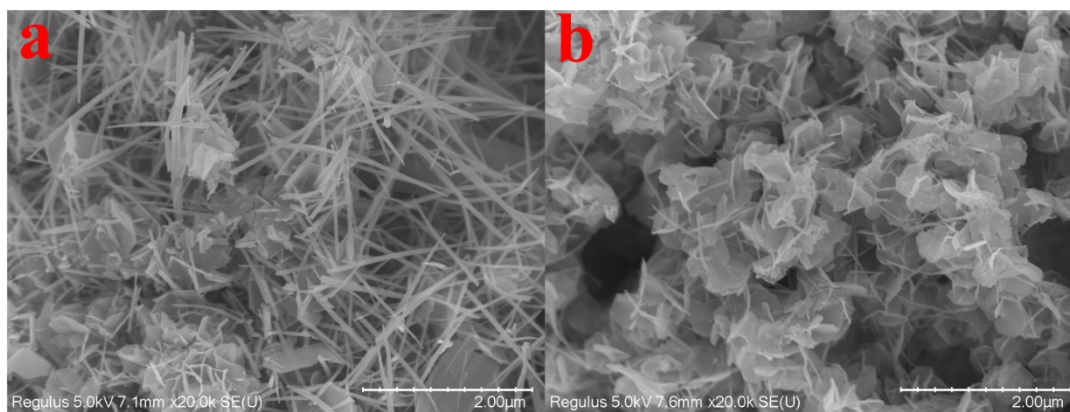

**Fig. S5** SEM of (a) CeO<sub>2</sub>@CoFe<sub>2</sub>O<sub>4</sub>/NF and (b) CeO<sub>2</sub>@CoFe<sub>2</sub>O<sub>4</sub>/NF after long-term durability.

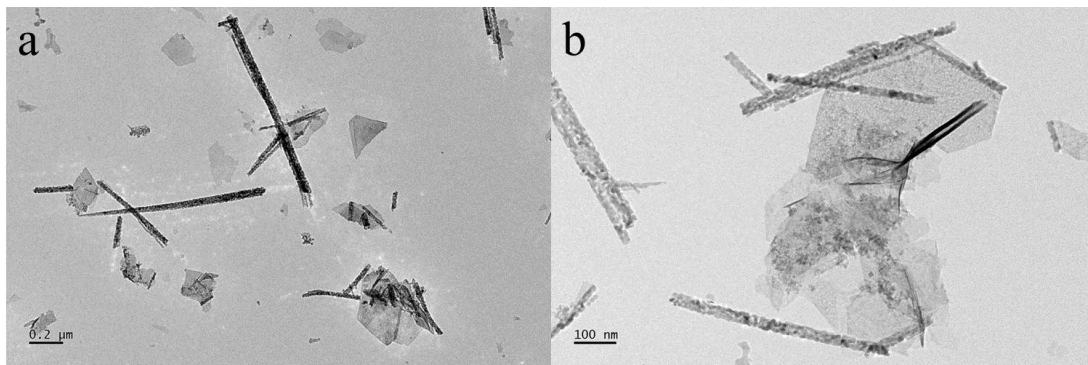

**Fig. S6** TEM of (a)  $\text{CeO}_2@\text{CoFe}_2\text{O}_4/\text{NF}$  and (b)  $\text{CeO}_2@\text{CoFe}_2\text{O}_4/\text{NF}$  after long-term durability.
